# Supplementary material
Source: Springer Nature journal article supplement (https://www.springermedizin.de/resource/supplementary/12943_2004_62_MOESM1_ESM.pdf/9553354)
Supplement: MOESM1 [file 9553354]

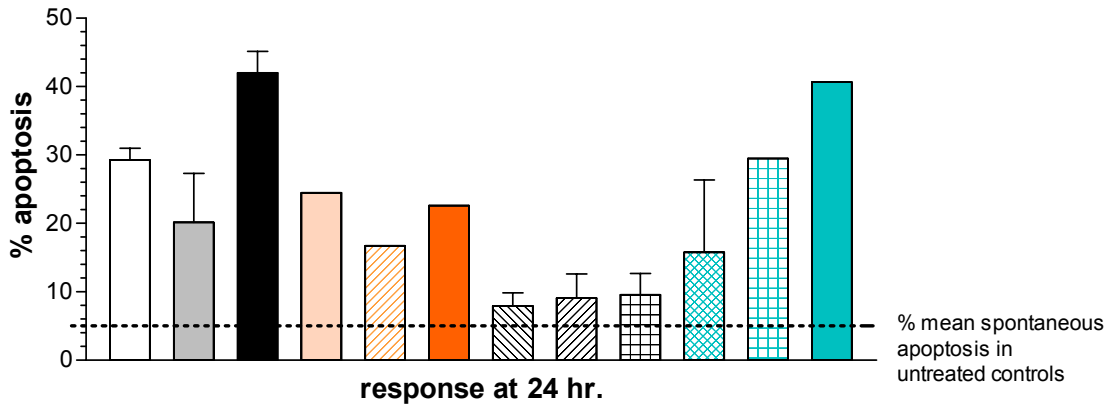

□ parental + 39  $\mu$ M  
 ■ parental + 190  $\mu$ M  
 ■ parental + 770  $\mu$ M

▨ ContinD + 39  $\mu$ M  
 ▩ ContinD + 190  $\mu$ M  
 ▧ ContinD + 770  $\mu$ M

■ ContinB + 39  $\mu$ M  
 ▨ ContinB + 190  $\mu$ M  
 ■ ContinB + 770  $\mu$ M

▨ Bolus3 + 39  $\mu$ M  
 ▧ Bolus3 + 190  $\mu$ M  
 ■ Bolus3 + 770  $\mu$ M
